# Supplementary material for: Projection range of eDNA analysis in marshes: a suggestion from the Siberian salamander (Salamandrella keyserlingii) inhabiting the Kushiro marsh, Japan
Source: PeerJ. 2020 Aug 20;8:e9764. doi: 10.7717/peerj.9764 (PMC7443320; doi:10.7717/peerj.9764)
Supplement: Supplemental Information 3 — These data were downloaded from National Center for Biotechnology Information (NCBI). [file peerj-08-9764-s003.xlsx]

## Sheet: Sheet1
Table S1：Sequence data used for the new primers and probes
Species	Accession number
Siberian salamander (Salamandrella keyserlingii)	AB363573–AB363595
	EU156965–EU157027
	AY701904–AY701989
	AY593141
	GQ849138–GQ849190
	MH319817–MH319825
Hokkaido salamander (Hynobius retardatus)	AB363609
	HM036351
These data were downloaded from National Center for Biotechnology Information (NCBI).
