# Supplementary material for: Projection range of eDNA analysis in marshes: a suggestion from the Siberian salamander (Salamandrella keyserlingii) inhabiting the Kushiro marsh, Japan
Source: PeerJ. 2020 Aug 20;8:e9764. doi: 10.7717/peerj.9764 (PMC7443320; doi:10.7717/peerj.9764)
Supplement: Supplemental Information 4 — See the legend of Figure 1 for details. [file peerj-08-9764-s004.xlsx]

## Sheet: Sheet1
Table S2: Results of the tank experiments
Date	Property	Number	Amount of filtered water(L)	Positive wells(/3)	eDNA conc.（copies/L）	Notes
April 23	egg sacs	1	0.35	3	10166.9
		2	0.325	3	5351.5
		3	0.35	3	7035.4
	adults	1	0.5	3	4.48677e+07
		2	0.5	3	2.01061e+07
		3	0.5	3	8157151
	tank NC	1	0.5	2	160
	filtration NC	n.d.	0.5	0	0
April 30	egg sacs	1	0.35	3	265.9	DNA sample: 5 μL
		2	0.35	3	391.7
		3	0.35	3	297.5
	adults	1	0.5	3	7.98792e+07
		2	0.5	3	18538238
		3	0.5	3	1.19897e+08
	tank NC	1	0.5	1	22.2	DNA sample: 5 μL
	filtration NC	n.d.	0.5	0	0
May 7	egg sacs	1	0.35	3	268.6	DNA sample: 5 μL
		2	0.35	3	311.4
		3	0.35	3	121.9
	adults	1	0.5	3	2.62835e+06
		3	0.5	3	746347	used for specificity check
	tank NC	1	0.5	0	0	DNA sample: 5 μL
	filtration NC	n.d.	0.5	0	0
April 23–May 7	PCR NC	n.d.	n.d.	0	0
April 30–May 7	PCR NC	n.d.	n.d.	0	0	Pure water: 5 μL
May 15	egg sacs	1	0.325	3	5627645	hatching on May9
		2	0.31	3	3.35394e+06	hatching on May11
		3	0.325	3	2.52701e+06	hatching on May10
	adults	1	0.5	3	106134
		3	0.5	3	1.27639e+06
	tank NC	1	0.5	0	0
	filtration NC	n.d.	0.5	0	0
May 22	larvae	1	0.375	3	120063
		2	0.325	3	250592
		3	0.35	3	414324
		4	0.35	3	279560
		5	0.35	3	365158
	tank NC	1	0.5	0	0
	filtration NC	n.d.	0.5	0	0
May 29	larvae	1	0.35	3	2.77167e+06
		2	0.325	3	223641
		3	0.3	3	348283
		4	0.325	3	16764.9
		5	0.325	3	160158
	tank NC	1	0.5	3	488
	filtration NC	n.d.	0.5	0	0
May 12–May 29	PCR NC2	n.d.	n.d.	0	0
See also the legend of Figure 1 for details.
