# Supplementary material for: Projection range of eDNA analysis in marshes: a suggestion from the Siberian salamander (Salamandrella keyserlingii) inhabiting the Kushiro marsh, Japan
Source: PeerJ. 2020 Aug 20;8:e9764. doi: 10.7717/peerj.9764 (PMC7443320; doi:10.7717/peerj.9764)
Supplement: Supplemental Information 5 — Site numbers (1–77) correspond to those of Supplemental Figure S2. [file peerj-08-9764-s005.xlsx]

## Sheet: Sheet1
Table S3: Results of observation of egg sacs
Site	Number of egg sacs (pairs)	Date
1	6	2017-05-09 09:28:00
2	2	2017-05-09 09:29:00
3	4	2017-05-09 09:31:00
4	16	2017-05-09 09:33:00
5	2	2017-05-09 09:34:00
6	1	2017-05-09 09:34:00
7	2	2017-05-09 09:35:00
8	2	2017-05-09 09:36:00
9	1	2017-05-09 09:36:00
10	1	2017-05-09 09:37:00
11	7	2017-05-09 09:38:00
12	6	2017-05-09 09:39:00
13	10	2017-05-09 09:42:00
14	1	2017-05-09 09:44:00
15	2	2017-05-09 09:46:00
16	1	2017-05-09 09:48:00
17	7	2017-05-09 10:07:00
18	2	2017-05-09 10:20:00
19	1	2017-05-09 10:21:00
20	1	2017-05-09 10:22:00
21	1	2017-05-09 10:23:00
22	1	2017-05-09 10:38:00
23	5	2017-05-09 10:40:00
24	2	2017-05-09 10:40:00
25	1	2017-05-09 10:47:00
26	1	2017-05-09 10:57:00
27	2	2017-05-09 10:57:00
28	5	2017-05-09 11:02:00
29	1	2017-05-09 11:02:00
30	1	2017-05-09 11:06:00
31	1	2017-05-09 11:06:00
32	2	2017-05-09 11:18:00
33	1	2017-05-09 11:18:00
34	3	2017-05-09 11:22:00
35	3	2017-05-09 11:22:00
36	2	2017-05-09 11:24:00
37	3	2017-05-09 11:25:00
38	2	2017-05-09 11:25:00
39	2	2017-05-09 11:26:00
40	1	2017-05-09 11:27:00
41	2	2017-05-09 11:27:00
42	2	2017-05-09 11:30:00
43	1	2017-05-09 11:31:00
44	1	2017-05-09 11:36:00
45	1	2017-05-09 11:36:00
46	1	2017-05-09 11:37:00
47	3	2017-05-09 11:37:00
48	1	2017-05-09 11:39:00
49	1	2017-05-09 11:41:00
50	3	2017-05-09 11:47:00
51	2	2017-05-09 11:52:00
52	1	2017-05-09 13:50:00
53	3	2017-05-09 14:31:00
54	2	2017-05-09 14:32:00
55	1	2017-05-10 10:08:00
56	1	2017-05-10 10:12:00
57	1	2017-05-10 10:22:00
58	2	2017-05-10 10:23:00
59	1	2017-05-10 10:24:00
60	1	2017-05-10 10:24:00
61	1	2017-05-10 10:24:00
62	1	2017-05-10 10:28:00
63	1	2017-05-10 10:31:00
64	1	2017-05-10 10:36:00
65	2	2017-05-10 10:51:00
66	1	2017-05-10 10:52:00
67	1	2017-05-10 11:49:00
68	1	2017-05-10 11:56:00
69	1	2017-05-10 11:56:00
70	1	2017-05-10 11:57:00
71	1	2017-05-10 13:26:00
72	1	2017-05-10 14:39:00
73	1	2017-05-10 15:03:00
74	4	2017-05-10 15:51:00
75	2	2017-05-10 15:52:00
76	1	2017-05-11 09:21:00
77	3	2017-05-11 09:23:00
Site numbers (1–77) correspond to those of Supprimental Figure S2.
