# Supplementary material for: Projection range of eDNA analysis in marshes: a suggestion from the Siberian salamander (Salamandrella keyserlingii) inhabiting the Kushiro marsh, Japan
Source: PeerJ. 2020 Aug 20;8:e9764. doi: 10.7717/peerj.9764 (PMC7443320; doi:10.7717/peerj.9764)
Supplement: Supplemental Information 7 — July NC is the filtration negative control. The eDNA copy number per reaction was the average of the quantitative values of 3 wells. Non-amplified wells were included in the calculation as 0 copy (Ellison et al., 2006). [file peerj-08-9764-s007.xlsx]

## Sheet: Sheet1
Table S5: Results of July field samples using the Cytb detection assay
Sample	Positive wells(/3)	eDNA conc.（copies/L）
July 1	0	0
July 2	0	0
July 3	0	0
July 4	0	0
July 5	0	0
July 6	0	0
July 7	0	0
July 12	0	0
July 13	0	0
July 16	0	0
July 24	0	0
July 26	0	0
July 27	0	0
July 28	1	20.1
July 29	3	428.2
July 31	0	0
July 37	0	0
July 41	0	0
July 42	0	0
July 44	0	0
July 46	0	0
July 49	0	0
July 50	0	0
July 51	0	0
July 52	0	0
July 53	0	0
July 54	0	0
July 58	0	0
July 59	0	0
July 60	0	0
July 61	1	65.9
July 62	0	0
July 63	0	0
July 64	0	0
July 65	0	0
July 66	0	0
July 67	0	0
July 68	0	0
July 69	0	0
July 70	0	0
July 71	0	0
July 72	0	0
July 73	0	0
July 74	0	0
July 75	0	0
July 76	0	0
July 77	0	0
July 78	0	0
July 80	0	0
July 81	0	0
July 82	0	0
July 83	0	0
July 84	0	0
July 85	0	0
July 86	0	0
July 87	0	0
July 88	0	0
July 89	0	0
July 91	0	0
July 92	0	0
July 93	0	0
July 94	0	0
July 95	0	0
July 96	0	0
July 97	0	0
July 98	0	0
July 101	0	0
July 102	0	0
July 103	0	0
July 104	0	0
July 106	0	0
July 107	0	0
July 108	0	0
July 112	0	0
July 113	0	0
July 114	0	0
July 115	0	0
July 116	0	0
July 117	0	0
July NC	0	0
July NC is the filtration negative control. The eDNA copy number per reaction was the average of the quantitative values of 3 wells. Non-amplified wells were included in the calculation as 0 copy (Ellison et al. 2006).
