# Supplementary material for: Projection range of eDNA analysis in marshes: a suggestion from the Siberian salamander (Salamandrella keyserlingii) inhabiting the Kushiro marsh, Japan
Source: PeerJ. 2020 Aug 20;8:e9764. doi: 10.7717/peerj.9764 (PMC7443320; doi:10.7717/peerj.9764)
Supplement: Supplemental Information 8 — May NC1–7 are the filtration negative controls. The eDNA copy number per reaction was the average of the quantitative values of 3 wells. Non-amplified wells were included in the calculation as 0 copy (Ellison et al., 2006). [file peerj-08-9764-s008.xlsx]

## Sheet: Sheet1
Table S6: Results of May field samples using the 12S detection assay
Sample	Positive wells(/3)	eDNA conc.（copies/L）
May 78	1	0.4
May 79	2	5.7
May 80	3	67.7
May 81	1	8.9
May 82	1	89.7
May 83	0	0
May 84	0	0
May 85	0	0
May 86	0	0
May 87	2	9
May 88	0	0
May 89	0	0
May 90	0	0
May 91	0	0
May 92	0	0
May 93	0	0
May 94	1	0.1
May 95	1	4.1
May 96	0	0
May 97	0	0
May 98	0	0
May 99	0	0
May 100	0	0
May 101	0	0
May 102	0	0
May 103	0	0
May 104	0	0
May 105	0	0
May 106	0	0
May 107	0	0
May 108	0	0
May 109	0	0
May 110	2	5.8
May 111	0	0
May 112	0	0
May 113	3	1.8
May 114	1	44
May 115	0	0
May 116	0	0
May 117	0	0
May 118	0	0
May 119	0	0
May 120	0	0
May 121	0	0
May 122	0	0
May 123	0	0
May 124	0	0
May 125	0	0
May 126	0	0
May 127	0	0
May 128	1	0.1
May 129	0	0
May 130	0	0
May 131	0	0
May 132	0	0
May 133	0	0
May 134	0	0
May 135	0	0
May 136	0	0
May 137	0	0
May 138	0	0
May 139	0	0
May 140	0	0
May 141	0	0
May 142	0	0
May 143	0	0
May 144	1	0.6
May 145	0	0
May 146	0	0
May 147	0	0
May 148	0	0
May 149	0	0
May 150	0	0
May 151	0	0
May 152	1	138.3
May 153	0	0
May 154	0	0
May 155	0	0
May 156	0	0
May 157	0	0
May 158	0	0
May 159	0	0
May 160	0	0
May 161	0	0
May 162	0	0
May 163	0	0
May 164	0	0
May 165	0	0
May 166	0	0
May 167	0	0
May 168	0	0
May 169	0	0
May 170	0	0
May 171	0	0
May 172	0	0
May 173	0	0
May 174	0	0
May 175	0	0
May 176	0	0
May NC1	0	0
May NC2	0	0
May NC3	0	0
May NC4	0	0
May NC5	0	0
May NC6	0	0
May NC7	0	0
May NC1–7 are the filtration negative controls. The eDNA copy number per reaction was the average of the quantitative values of 3 wells. Non-amplified wells were included in the calculation as 0 copy (Ellison et al. 2006).
